# Supplementary material for: Nuclear Export of Cyclin B Mediated by the Nup62 Complex Is Required for Meiotic Initiation in Drosophila Males
Source: MDPI journal article supplement (doi:10.3390/cells9020270), 2020-01-22
Supplement: s1 [file s1]

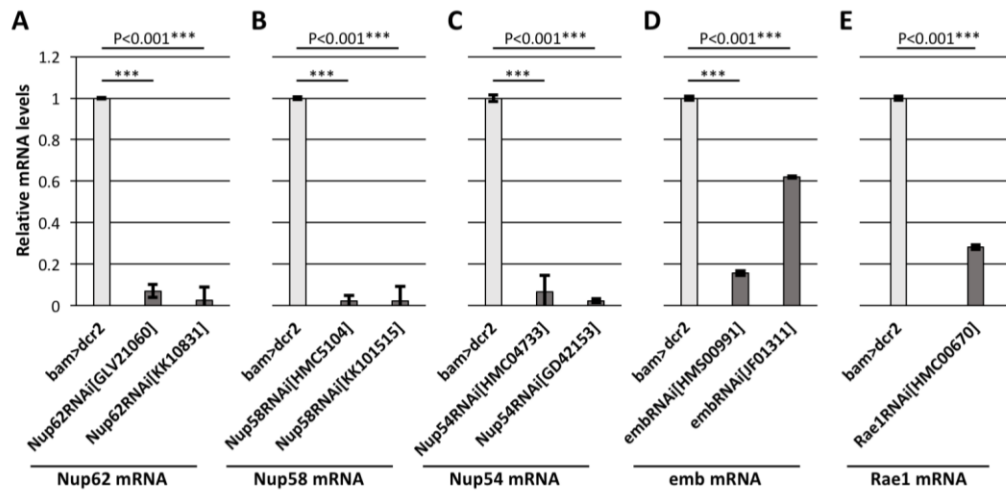

Figure S1: qRT-PCR experiments to confirm that UAS-RNAi stocks used in this study can deplete the relevant mRNAs efficiently.

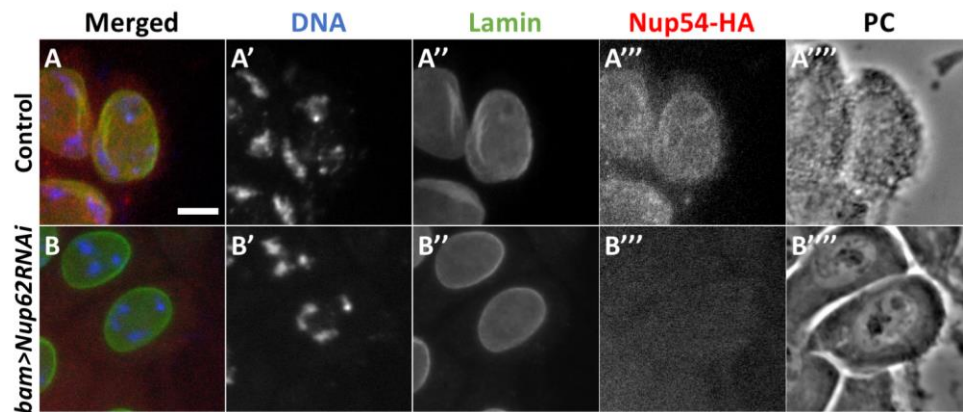

Figure S2: Immunostaining of premeiotic spermatocytes to confirm that Nup54, another component of Nup62 complex is not localized on nuclear envelope in the Nup62-depleted spermatocytes.

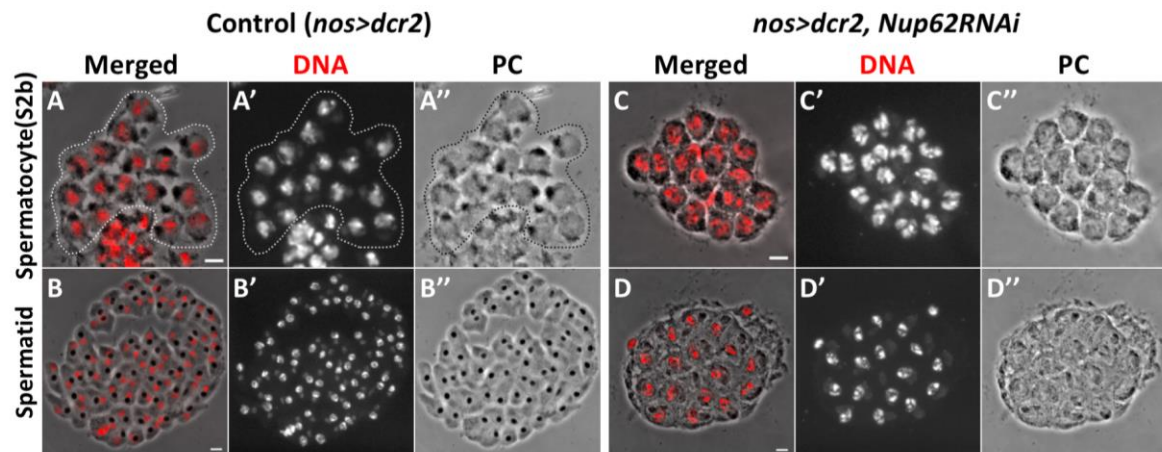

Figure S3: Intact cysts consisted of early spermatocytes generated from mitoses of spermatogonia and those of post-meiotic cells derived from spermatocytes depleted of Nup62.
